# Supplementary material for: Factors on the separation of photogenerated charges and the charge dynamics in oxide/ZnFe2O4composites
Source: Royal Society of Chemistry journal article supplement (doi:10.1039/c2tc00072e), 2012-10-11
Supplement: c2tc00072e.pdf [file c2tc00072e.pdf]

## Supplementary information

### Factors on the separation of photogenerated charges and the charge dynamics in oxide/ZnFe<sub>2</sub>O<sub>4</sub> composites

Xiangyang Liu,<sup>\*</sup> Haiwu Zheng, Yong li and Weifeng Zhang

*Key Laboratory of Photovoltaic Materials of Henan Province and School of Physics*

*& Electronics, Henan University, Kaifeng 475004, P.R. China*

*E-mail: [lxxy081276@126.com](mailto:lxxy081276@126.com)*

#### **Scanning electron microscopy and energy dispersive spectrometry**

Morphologies and chemical compositions were observed using scanning electron microscopy (SEM, JSM-6700F, JEOL) combining with energy dispersive spectrometry (EDS, INCA-ENERGY). The SEM images of four composites (WO<sub>3</sub>/ZFO,  $\alpha$ -Bi<sub>2</sub>O<sub>3</sub>/ZFO, TiO<sub>2</sub>/ZFO and SnO<sub>2</sub>/ZFO with the molar ratio 4:1) are shown in **Fig. SII** (a)-(d), respectively. From the SEM images, four composites all take on the phenomenon of aggregation and agglomerate to bulks. It is also shown that the particle sizes of composites from SEM are similar to TEM.

**Fig. SII** (e)-(h) illustrate the energy spectra of four composites (WO<sub>3</sub>/ZFO,  $\alpha$ -Bi<sub>2</sub>O<sub>3</sub>/ZFO, TiO<sub>2</sub>/ZFO and SnO<sub>2</sub>/ZFO with the molar ratio 4:1), respectively. Each energy spectrum includes the elements of their compositions and the atomic percents are almost consistent with the nominal molar ratios. The **Table SII** shows the atomic percents of four composites from their energy spectra and the corresponding composition ratios are about W:Zn:Fe:O=4:1:2:16, Bi:Zn:Fe:O=4:1:2:10, Ti:Zn:Fe:O=4:1:2:12 and Sn:Zn:Fe:O=4:1:2:12, respectively.

**Supplementary Tables**

**Table SI1** The atomic percents of four composites ( $\text{WO}_3/\text{ZFO}$ ,  $\alpha\text{-Bi}_2\text{O}_3/\text{ZFO}$ ,  $\text{TiO}_2/\text{ZFO}$  and  $\text{SnO}_2/\text{ZFO}$ ) with the molar ratio 4:1 of (W, Bi, Ti and Sn)/Zn from their energy dispersive spectra.

| material       | <u><math>\text{WO}_3/\text{ZFO}</math></u> |      |      |       | <u><math>\alpha\text{-Bi}_2\text{O}_3/\text{ZFO}</math></u> |      |       |       | <u><math>\text{TiO}_2/\text{ZFO}</math></u> |      |       |       | <u><math>\text{SnO}_2/\text{ZFO}</math></u> |      |       |       |
|----------------|--------------------------------------------|------|------|-------|-------------------------------------------------------------|------|-------|-------|---------------------------------------------|------|-------|-------|---------------------------------------------|------|-------|-------|
| element        | W                                          | Zn   | Fe   | O     | Bi                                                          | Zn   | Fe    | O     | Ti                                          | Zn   | Fe    | O     | Sn                                          | Zn   | Fe    | O     |
| atomic percent | 17.41                                      | 4.36 | 8.66 | 69.56 | 23.57                                                       | 5.84 | 11.72 | 58.86 | 21.08                                       | 5.23 | 10.51 | 63.18 | 21.11                                       | 5.18 | 10.48 | 63.22 |

**Table SI2** The average particle sizes of  $\text{WO}_3/\text{ZFO}$ ,  $\alpha\text{-Bi}_2\text{O}_3/\text{ZFO}$ ,  $\text{TiO}_2/\text{ZFO}$  and  $\text{SnO}_2/\text{ZFO}$  with four molar ratios.

| Material    | $\text{WO}_3/\text{ZFO}$    | $\alpha\text{-Bi}_2\text{O}_3/\text{ZFO}$ | $\text{TiO}_2/\text{ZFO}$ | $\text{SnO}_2/\text{ZFO}$ |
|-------------|-----------------------------|-------------------------------------------|---------------------------|---------------------------|
| molar ratio | average particle sizes (nm) |                                           |                           |                           |
| 2:1         | 198                         | 395                                       | 201                       | 306                       |
| 4:1         | 21                          | 202                                       | 83                        | 218                       |
| 6:1         | 165                         | 343                                       | 172                       | 372                       |
| 8:1         | 200                         | 238                                       | 186                       | 524                       |

**Table SI3** The surface areas of WO<sub>3</sub>/ZFO, α-Bi<sub>2</sub>O<sub>3</sub>/ZFO, TiO<sub>2</sub>/ZFO and SnO<sub>2</sub>/ZFO with four molar ratios.

| Material    | WO <sub>3</sub> /ZFO             | α-Bi <sub>2</sub> O <sub>3</sub> /ZFO | TiO <sub>2</sub> /ZFO | SnO <sub>2</sub> /ZFO |
|-------------|----------------------------------|---------------------------------------|-----------------------|-----------------------|
| molar ratio | Surface area (m <sup>2</sup> /g) |                                       |                       |                       |
| 2:1         | 2.58                             | 39.9                                  | 5.72                  | 2.97                  |
| 4:1         | 23.6                             | 78.2                                  | 13.8                  | 4.19                  |
| 6:1         | 3.01                             | 46.5                                  | 6.74                  | 2.42                  |
| 8:1         | 2.41                             | 66.2                                  | 6.22                  | 1.76                  |

**Table SI4** The zeta potentials of WO<sub>3</sub>/ZFO, α-Bi<sub>2</sub>O<sub>3</sub>/ZFO, TiO<sub>2</sub>/ZFO and SnO<sub>2</sub>/ZFO with four molar ratios.

| Material    | WO <sub>3</sub> /ZFO | α-Bi <sub>2</sub> O <sub>3</sub> /ZFO | TiO <sub>2</sub> /ZFO | SnO <sub>2</sub> /ZFO |
|-------------|----------------------|---------------------------------------|-----------------------|-----------------------|
| molar ratio | zeta potentials (mV) |                                       |                       |                       |
| 2:1         | -38                  | -21.4                                 | -30.6                 | 10.7                  |
| 4:1         | -23.8                | 22.4                                  | -21.4                 | 33.3                  |
| 6:1         | -36.7                | -10.2                                 | -24.8                 | -16.6                 |
| 8:1         | -38.1                | -21.6                                 | -26.9                 | 8.61                  |

**Supplementary Figures**

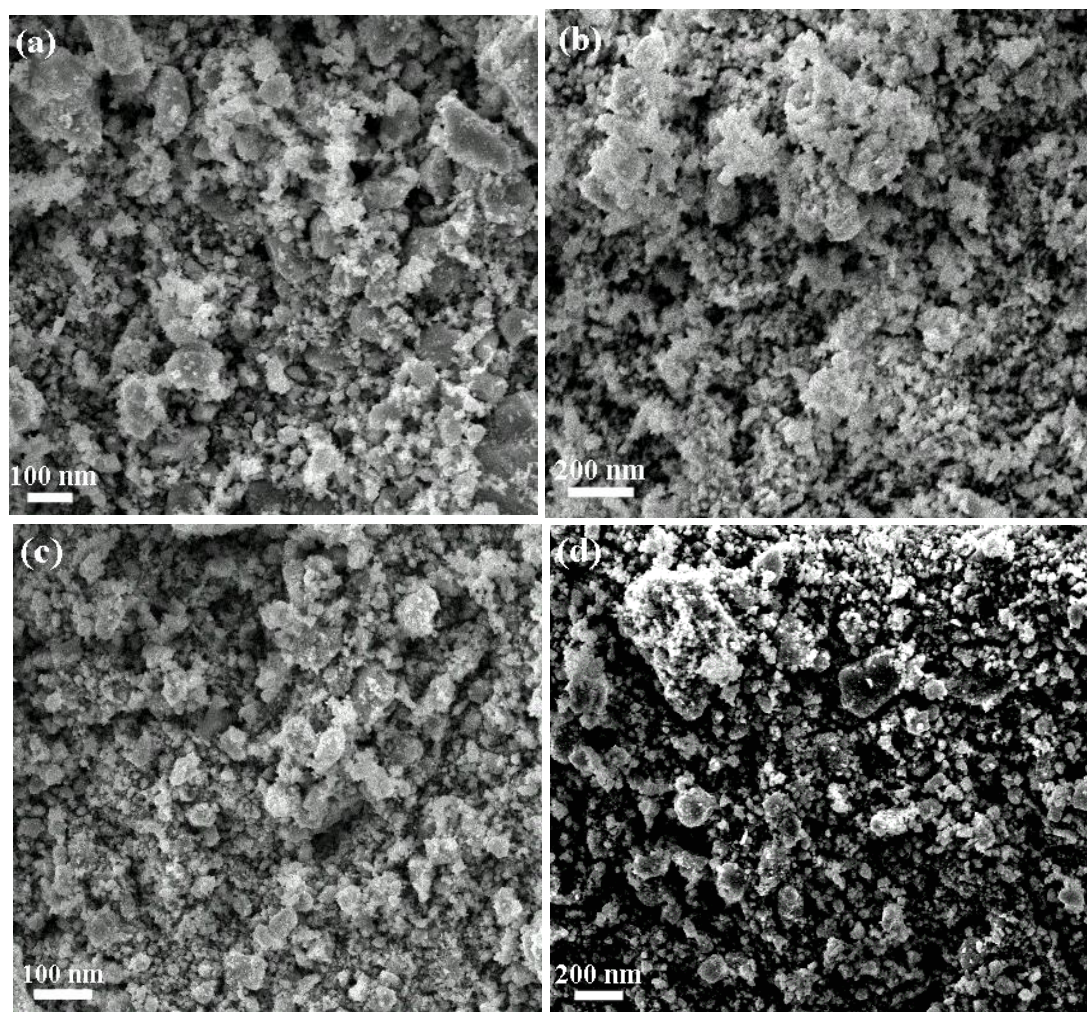

**Fig. SI1** ((a), (b), (c) and (d)) SEM images of WO<sub>3</sub>/ZFO, α-Bi<sub>2</sub>O<sub>3</sub>/ZFO, TiO<sub>2</sub>/ZFO and SnO<sub>2</sub>/ZFO with the molar ratio 4:1, respectively.

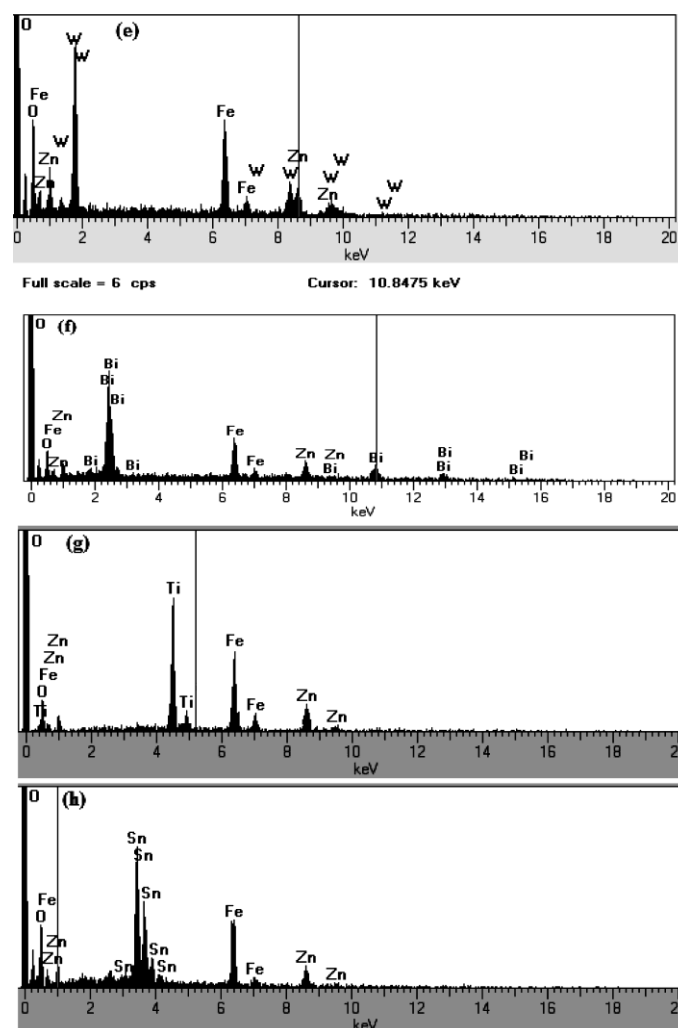

**Fig. SI1** ((e), (f), (g) and (h)) Energy dispersive spectrometry (EDS) of WO<sub>3</sub>/ZFO, α-Bi<sub>2</sub>O<sub>3</sub>/ZFO, TiO<sub>2</sub>/ZFO and SnO<sub>2</sub>/ZFO with the molar ratio 4:1, respectively.

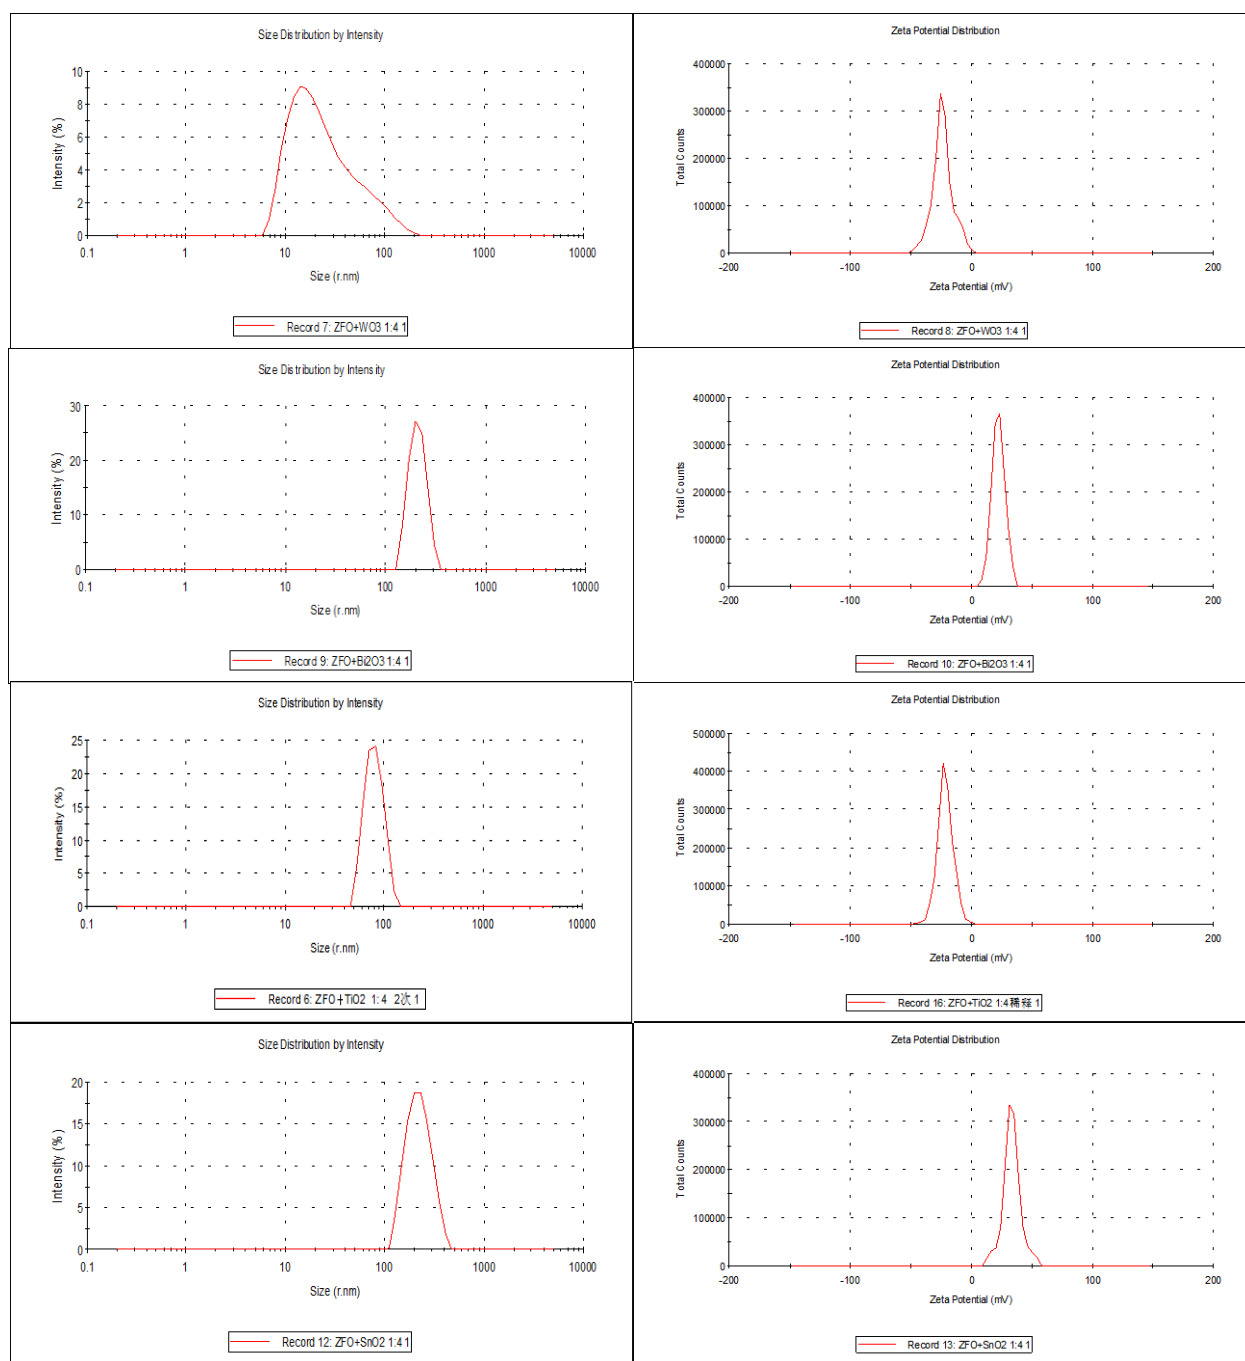

**Fig. SI2** The distribution of particle sizes and zeta potentials for WO<sub>3</sub>/ZFO, α-Bi<sub>2</sub>O<sub>3</sub>/ZFO, TiO<sub>2</sub>/ZFO and SnO<sub>2</sub>/ZFO with molar ratio 4:1.

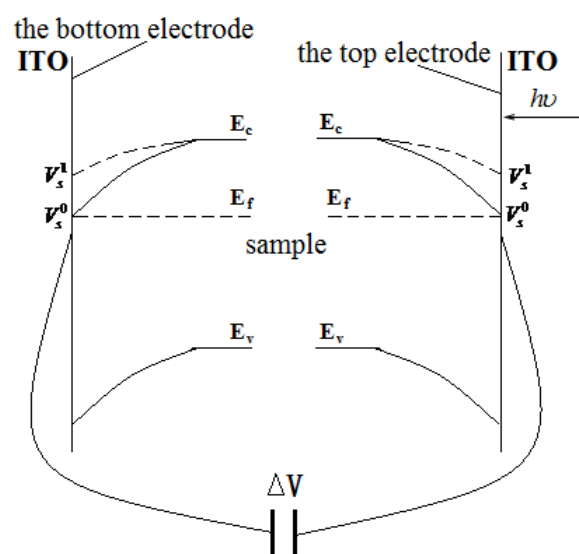

**Fig. SI3** The schematic diagram of sandwich structure consisting of ITO (indium tin oxide) and material in the steady-state SPS, TPV and EFISPS. ( $E_c$ : the bottom of conduction band;  $E_v$ : the top of valence band;  $E_f$ : the Fermi energy level;  $\Delta V$ : the difference of different surface potential;  $V_s^0$ : the surface potential before illumination;  $V_s^1$ : the surface potential after illumination;  $V_s^0, V_s^1 < 0$ ;  $h\nu$ : the incident photon energy).
